# Supplementary material for: The Potential of 3-D Building Height Data to Characterize Socioeconomic Activities: A Case Study from 38 Cities in China
Source: MDPI journal article supplement (doi:10.3390/rs14092087), 2022-04-27
Supplement: s1 [file s1]

# Supplementary Materials for

## The Potential of 3-D Building Height Data to Characterize Socioeconomic Activities: A Case Study from 38 Cities in China

Guojiang Yu <sup>1</sup>, Zixuan Xie <sup>1</sup>, Xuecao Li <sup>1,2,\*</sup>, Yixuan Wang <sup>1</sup>, Jianxi Huang <sup>1,2</sup> and Xiaochuang Yao <sup>1,2</sup>

- <sup>1</sup> College of Land Science and Technology, China Agricultural University, Beijing 100083, China; yuguojiang@cau.edu.cn (G.Y.); sy20203213092@cau.edu.cn (Z.X.); clstwyx@cau.edu.cn (Y.W.); jxhuang@cau.edu.cn (J.H.); yxc@cau.edu.cn (X.Y.)
- <sup>2</sup> Key Laboratory of Remote Sensing for Agri-Hazards, Ministry of Agriculture and Rural Affairs, Beijing 100083, China
- \* Correspondence: xuecaoli@cau.edu.cn

**Table S1.** Aggregated roads from Open Street Map.

| Category          | Sub-Categories             |
|-------------------|----------------------------|
| Main Roads        | Primary & Primary_link     |
|                   | Secondary & Secondary_link |
|                   | Tertiary & Tertiary_link   |
|                   | Trunk & Trunk_link         |
| Residential Roads | Footway                    |
|                   | Pedestrian                 |
|                   | Residential                |
| Commercial Roads  | Services                   |

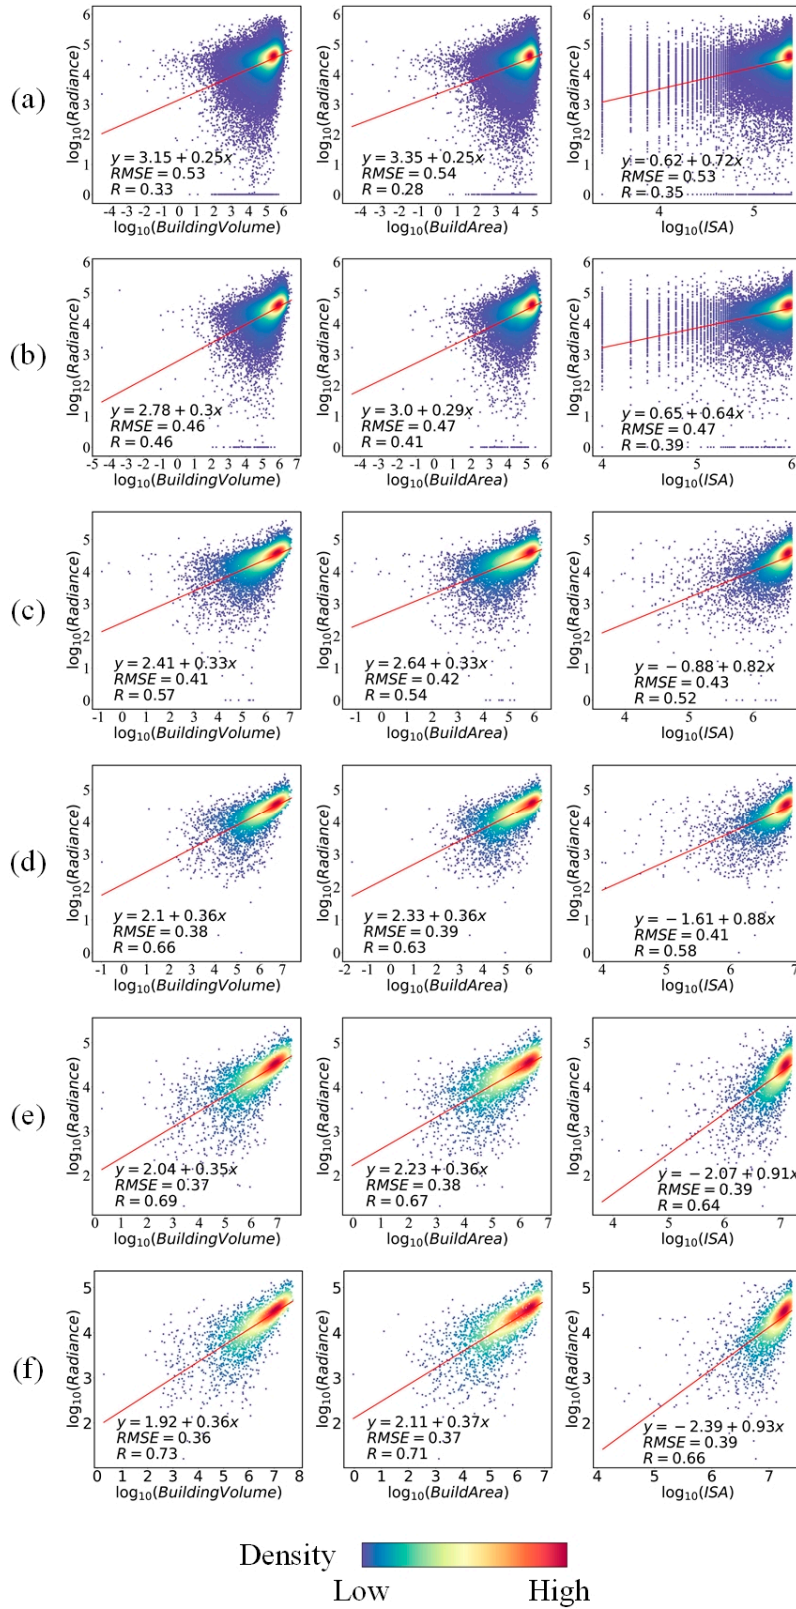

**Figure S1. The regression results in different scales. (a) 500m, (b) 1km, (c) 2km, (d) 3km, (e) 4km, (f) 5km.**

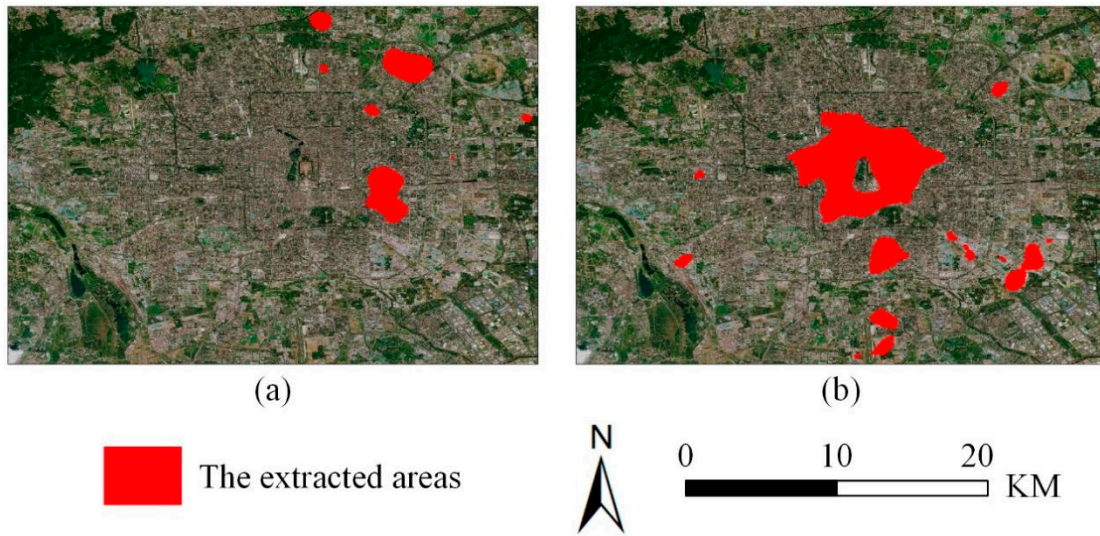

**Figure S2.** The extracted areas using the quantile-based approach with 3D (a) and 2D (b) indicators in Beijing.

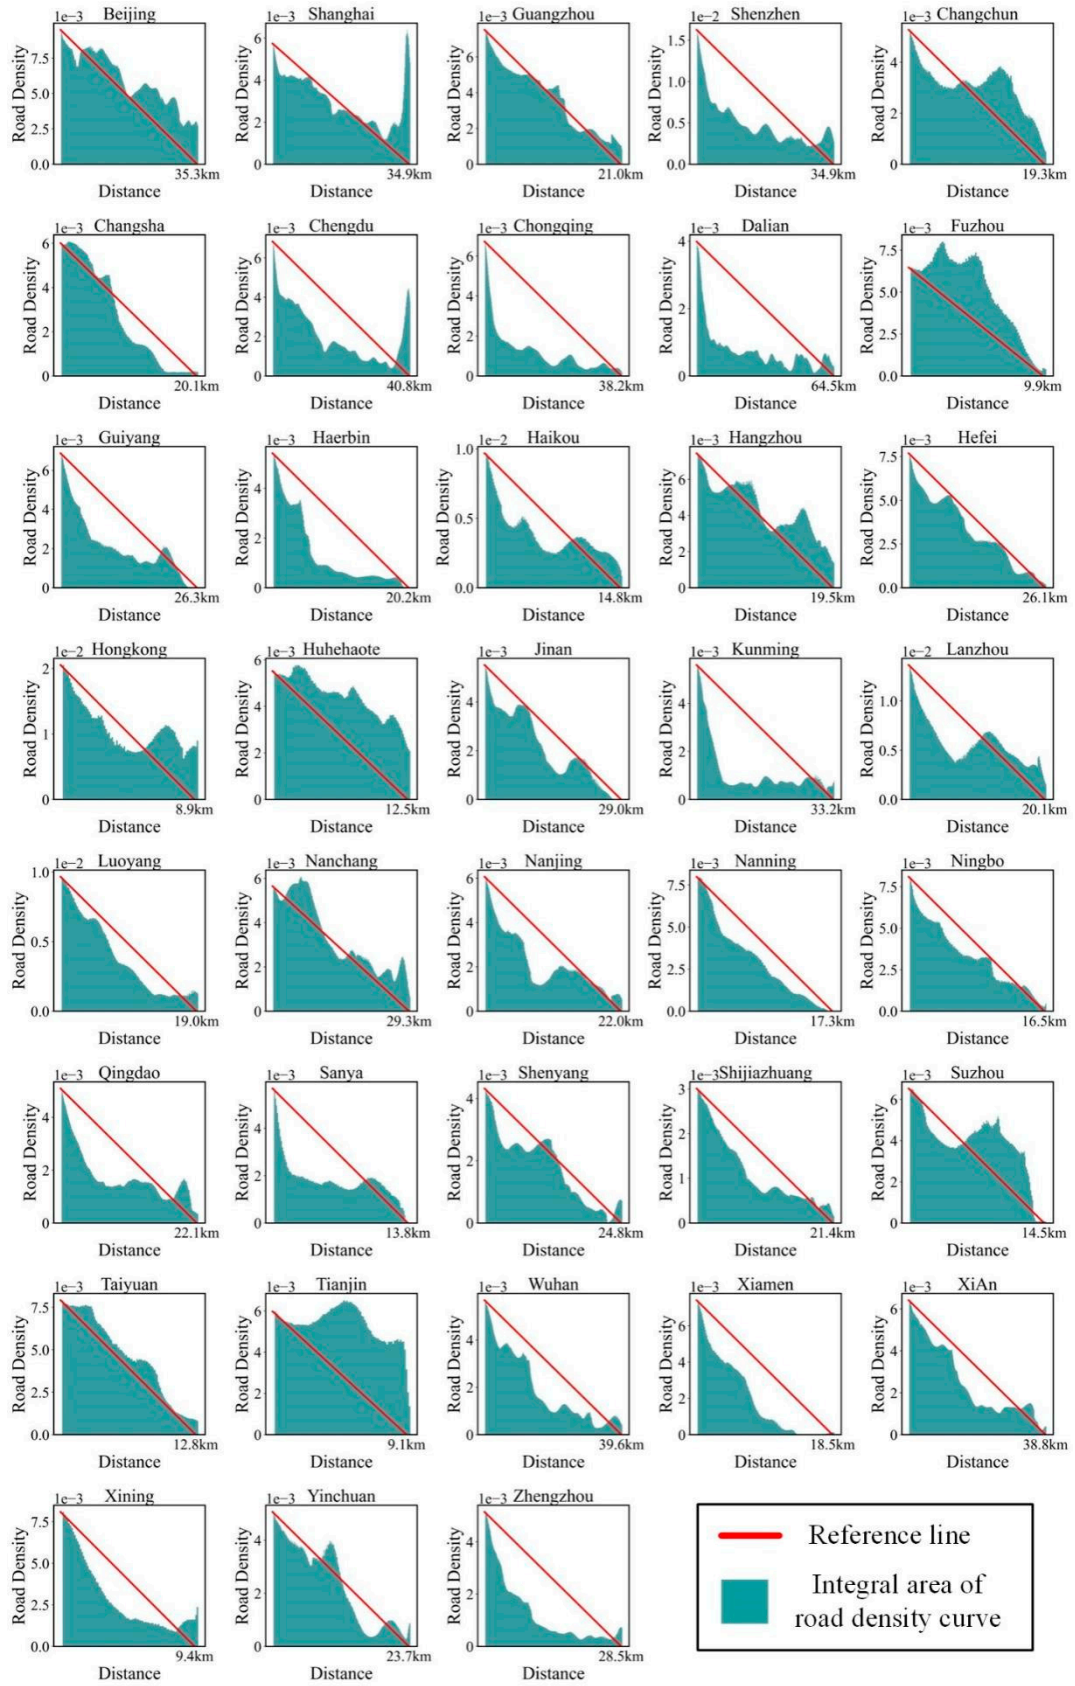

**Figure S3.** The road density curves of all cities.



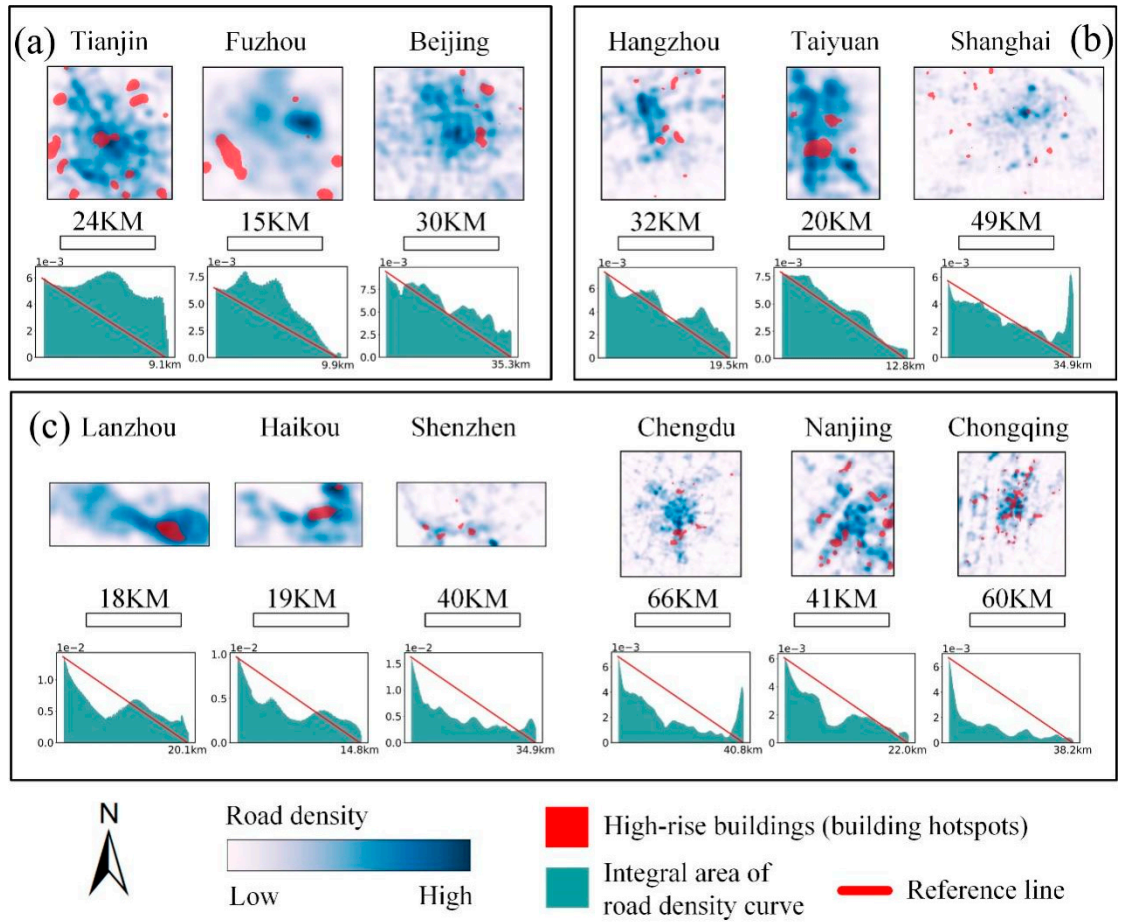

**Figure S4. Illustration of the road density curve change in representative cities with different road distribution patterns.** (a) imbalanced pattern, (b) balanced pattern, (c) sustainable pattern

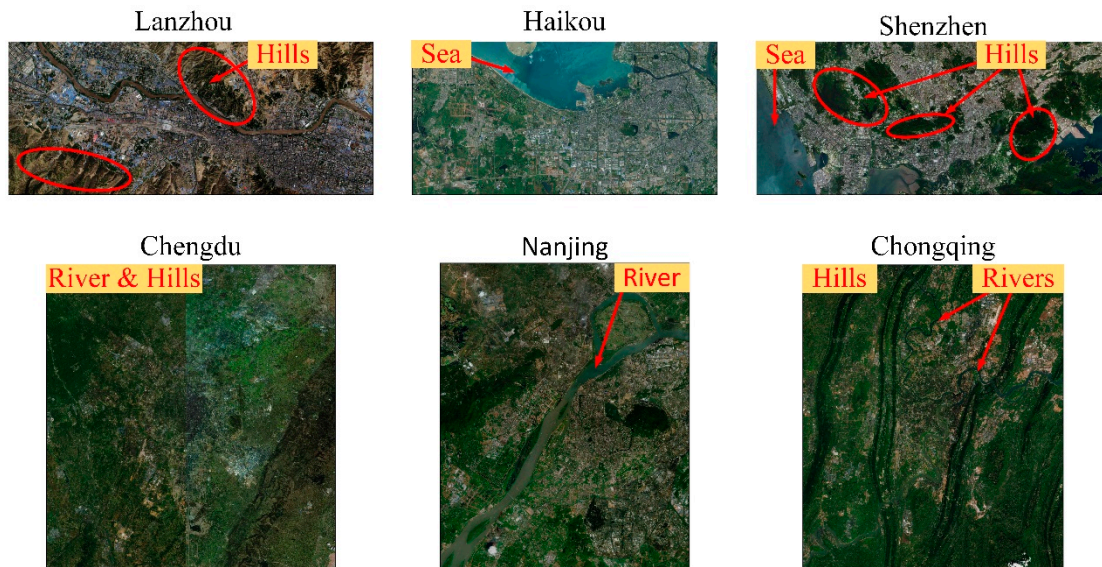

**Figure S5. Satellite images of six cities: Lanzhou, Haikou, Shenzhen, Chengdu, Nanjing, and Chongqing.** The hills and rivers are marked on the map.
